# Supplementary material
Source: publisher figshare collection journal article supplement (https://frontiersin.figshare.com/ndownloader/files/28974426)
Supplement: Supplementary file [file 28974426]

## Supplementary Data

|                           | Young        |                           | Aged            |               |
|---------------------------|--------------|---------------------------|-----------------|---------------|
|                           | Non-pregnant | Pregnant                  | Non-pregnant    | Pregnant      |
| Diastolic pressure (mmHg) | 90.1 ± 3.71  | 84.7 ± 1.87               | 108.7 ± 2.35*** | 89.3 ± 2.95   |
| Systolic pressure (mmHg)  | 120.3 ± 3.21 | 113.1 ± 3.38              | 147.0 ± 4.19*** | 120.6 ± 3.06  |
| Heart Rate (BPM)          | 375.2 ± 12.6 | 419.4 ± 15.0 <sup>#</sup> | 390.3 ± 13.49   | 404.3 ± 13.35 |

**Supplementary Table 1. Systolic, diastolic blood pressure (mmHg) and heart rate (BPM) readings from young and aged non-pregnant and pregnant rats on gestational day 20.** Data presented as mean±SEM; analyzed by two-way ANOVA with Sidak's multiple comparisons post-hoc test; <sup>#</sup>p=0.058; \*\*\*\*p<0.0001 compared to aged pregnant, young non-pregnant and pregnant rats; n= 9-10/group.

|                                   | Young          |                | Aged          |               |
|-----------------------------------|----------------|----------------|---------------|---------------|
|                                   | Non-pregnant   | Pregnant       | Non-pregnant  | Pregnant      |
| E <sub>max</sub> (% vasodilation) | 98.83 ± 4.81   | 99.21± 1.00    | 97.82 ± 3.42  | 99.29 ± 1.54  |
| AUC (arbitrary units)             | 330.64 ± 11.66 | 345.15 ± 13.68 | 323.49 ± 9.16 | 351.95 ± 9.66 |

**Supplementary Table 2. Endothelium-dependent vasodilation responses to methacholine (MCh) in mesenteric arteries from young and aged non-pregnant and pregnant rats.** Summarized as the maximal vasodilation responses (E<sub>max</sub>; % vasodilation) and area under the curve (AUC; arbitrary units) to MCh. Data presented as mean±SEM; analyzed by two-way ANOVA with Sidak's multiple comparisons post-hoc test; n=6-11/group.

|               | Young            |                  | Aged          |                  |
|---------------|------------------|------------------|---------------|------------------|
|               | Non-pregnant     | Pregnant         | Non-pregnant  | Pregnant         |
| Control (AUC) | 330.64 ± 11.66   | 345.15 ± 13.68   | 323.49 ± 9.16 | 351.95 ± 9.66    |
| L-NAME (AUC)  | 263.40 ± 13.96** | 272. 94 ± 24.92* | 291.76 ± 8.56 | 265.11 ± 21.35** |

**Supplementary Table 3. Contribution of the nitric oxide (NO) to endothelium-dependent vasodilation responses to methylcholine (MCh) in mesenteric arteries from young and aged non-pregnant and pregnant rats.** Summarized as the area under the curve (AUC; arbitrary units) to MCh after pre-incubation with the NO-inhibitor L-NAME or without inhibitor (control). Data presented as mean±SEM; analyzed by two-way ANOVA with Sidak's multiple comparisons post-hoc test; \*p<0.05, \*\*p<0.01 – L-NAME versus Control; n=6-11/group.

|                      | Young          |                | Aged            |                 |
|----------------------|----------------|----------------|-----------------|-----------------|
|                      | Non-pregnant   | Pregnant       | Non-pregnant    | Pregnant        |
| Control (AUC)        | 327.91 ± 11.81 | 349.37 ± 25.09 | 366.27 ± 13.56  | 359.38 ± 19.46  |
| Apamin/TRAM-34 (AUC) | 266.68 ± 26.84 | 351.28 ± 28.86 | 255.10 ± 24.63* | 274.63 ± 34.65* |

**Supplementary Table 4. Contribution of the EDH to endothelium-dependent vasodilation responses to methylcholine (MCh) in mesenteric arteries from young and aged non-pregnant and pregnant rats.** Summarized as the area under the curve (AUC; arbitrary units) to MCh after pre-incubation with EDH inhibitor - apamin/TRAM-34 or without inhibitor (control). Data presented as mean±SEM; analyzed by two-way ANOVA with Sidak's multiple comparisons post-hoc test; \*p<0.05 – Apamin/TRAM-34 versus Control; n=7-8/group.

|                                            | Young          |                | Aged           |                |
|--------------------------------------------|----------------|----------------|----------------|----------------|
|                                            | Non-pregnant   | Pregnant       | Non-pregnant   | Pregnant       |
| Control (pEC <sub>50</sub> )               | 7.26 ± 0.31    | 7.41 ± 0.35    | 7.50 ± 0.22    | 7.55 ± 0.42    |
| 18α-glycyrrhetic acid (pEC <sub>50</sub> ) | 7.36 ± 0.42    | 7.73 ± 0.15    | 7.43 ± 0.49    | 7.76 ± 0.42    |
| Control (E <sub>max</sub> )                | 97.50 ± 1.39   | 101.15 ± 2.97  | 99.94 ± 0.18   | 97.91 ± 1.19   |
| 18α-glycyrrhetic acid (E <sub>max</sub> )  | 96.42 ± 1.12   | 98.75 ± 0.45   | 98.44 ± 0.45   | 98.30 ± 0.51   |
| Control (AUC)                              | 315.41 ± 19.65 | 349.37 ± 25.09 | 366.27 ± 13.56 | 359.38 ± 19.46 |
| 18α-glycyrrhetic acid (AUC)                | 330.19 ± 23.46 | 371.21 ± 24.04 | 363.41 ± 18.08 | 377.95 ± 16.20 |

**Supplementary Table 5. Contribution of the myoendothelial gap junctions (MEGJs) to endothelium-dependent vasodilation responses to methylcholine (MCh) in mesenteric arteries from young and aged non-pregnant and pregnant rats.** Summary of the sensitivity to MCh (pEC<sub>50</sub>), maximal vasodilation responses (E<sub>max</sub>; % vasodilation) and area under the curve (AUC; arbitrary units) to MCh after pre-incubation with the MEGJ-inhibitor 18α-glycyrrhetic acid or without inhibitor (control). Data presented as mean±SEM; analyzed by two-way ANOVA with Sidak's multiple comparisons post-hoc test; n=5-8/group.

|                                       | Young          |                | Aged          |                |
|---------------------------------------|----------------|----------------|---------------|----------------|
|                                       | Non-pregnant   | Pregnant       | Non-pregnant  | Pregnant       |
| SNP E <sub>max</sub> (% vasodilation) | 96.68 ± 1.59   | 93.32 ± 8.80   | 93.93 ± 7.59  | 95.59 ± 3.00   |
| SNP pEC <sub>50</sub>                 | 7.55 ± 0.08    | 7.85 ± 0.16    | 7.43 ± 0.10   | 7.65 ± 0.10    |
| SNP (AUC)                             | 315.41 ± 19.65 | 300.68 ± 10.74 | 242.75 ± 7.32 | 271.86 ± 11.68 |

**Supplementary Table 6. Endothelium-independent vasodilation responses to sodium nitroprusside (SNP) in mesenteric arteries from young and aged non-pregnant and pregnant rats.** Summarized as the maximal vasodilation responses (E<sub>max</sub>; % vasodilation), sensitivity to SNP (pEC<sub>50</sub>), and area under the curve (AUC; arbitrary units) to SNP. Data presented as mean±SEM; analyzed by two-way ANOVA with Sidak's multiple comparisons post-hoc test; n=5-8/group.

|                                     | Young        |             | Aged         |             |
|-------------------------------------|--------------|-------------|--------------|-------------|
|                                     | Non-pregnant | Pregnant    | Non-pregnant | Pregnant    |
| Big-ET-1 (E <sub>max</sub> ; mN/mm) | 4.56 ± 0.22  | 4.95 ± 0.27 | 6.56 ± 0.50  | 6.14 ± 0.64 |
| ET-1 (E <sub>max</sub> ; mN/mm)     | 5.37 ± 0.53  | 5.95 ± 0.37 | 7.10 ± 0.68  | 6.42 ± 0.65 |

**Supplementary Table 7. Vascular responses to bigET-1 and ET-1 in mesenteric arteries from young and aged non-pregnant and pregnant rats.** Summarized as the maximal vasocontraction responses (E<sub>max</sub>; mN/mm) to bigET-1 and ET-1. Data presented as mean±SEM; analyzed by two-way ANOVA with Sidak's multiple comparisons post-hoc test; n=6-16/group.

|                              | Young        |              | Aged          |               |
|------------------------------|--------------|--------------|---------------|---------------|
|                              | Non-pregnant | Pregnant     | Non-pregnant  | Pregnant      |
| Control (E <sub>max</sub> )  | 4.56 ± 0.22  | 4.95 ± 0.27  | 6.56 ± 0.50   | 6.14 ± 0.64   |
| GM6001 (E <sub>max</sub> )   | 5.28 ± 0.32  | 3.99 ± 0.42  | 5.38 ± 0.62   | 4.71 ± 0.55   |
| CGS35066 (E <sub>max</sub> ) | 3.96 ± 0.12  | 3.49 ± 0.15* | 3.46 ± 0.49** | 2.92 ± 0.27** |

**Supplementary Table 8. Contribution of matrix metalloproteases (MMPs) and endothelin converting enzymes (ECE-1) to the conversion of bigET-1 to ET-1 in mesenteric arteries from young and aged non-pregnant and pregnant rats.** Summarized as the maximal vasocontraction responses (E<sub>max</sub>; mN/mm) to bigET-1 responses after pre-incubation with GM6001 (MMPs inhibitor) or CGS35066 (ECE-1 inhibitor), or without inhibitor (control). Data presented as mean±SEM; analyzed by two-way ANOVA with Sidak's multiple comparisons post-hoc test; \*p<0.05, \*\*p<0.01– CGS35066 versus Control; n=6-16/ group.

|                                 | Young        |             | Aged         |             |
|---------------------------------|--------------|-------------|--------------|-------------|
|                                 | Non-pregnant | Pregnant    | Non-pregnant | Pregnant    |
| Control (AUC)                   | 0.49 ± 0.06  | 0.77 ± 0.18 | 1.09 ± 0.22  | 0.92 ± 0.13 |
| Chymostatin (AUC)               | 0.45 ± 0.10  | 0.48 ± 0.15 | 0.74 ± 0.18  | 0.73 ± 0.16 |
| Thiorphan (AUC)                 | 0.78 ± 0.14  | 0.82 ± 0.20 | 1.29 ± 0.23  | 0.96 ± 0.20 |
| Control (E <sub>max</sub> )     | 3.13 ± 0.27  | 4.23 ± 0.47 | 6.78 ± 0.76  | 7.79 ± 1.13 |
| Chymostatin (E <sub>max</sub> ) | 3.21 ± 0.53  | 2.98 ± 0.54 | 6.11 ± 1.23  | 6.12 ± 1.03 |
| Thiorphan (E <sub>max</sub> )   | 3.87 ± 0.24  | 3.41 ± 0.33 | 6.42 ± 0.73  | 6.32 ± 0.83 |

**Supplementary Table 9. Contribution of chymases and neutral endopeptidases to the conversion of bigET-1 to ET-1 in mesenteric arteries from young and aged non-pregnant and pregnant rats.** Summarized as the area under the curve (AUC; arbitrary units) and maximal vasocontraction responses (E<sub>max</sub>; mN/mm) to bigET-1 responses after pre-incubation with chymostatin (chymase inhibitor) or thiorphan (neutral endopeptidase inhibitor), or without inhibitor (control). Data presented as mean±SEM; analyzed by two-way ANOVA with Sidak's multiple comparisons post-hoc test; n=6-8/ group.

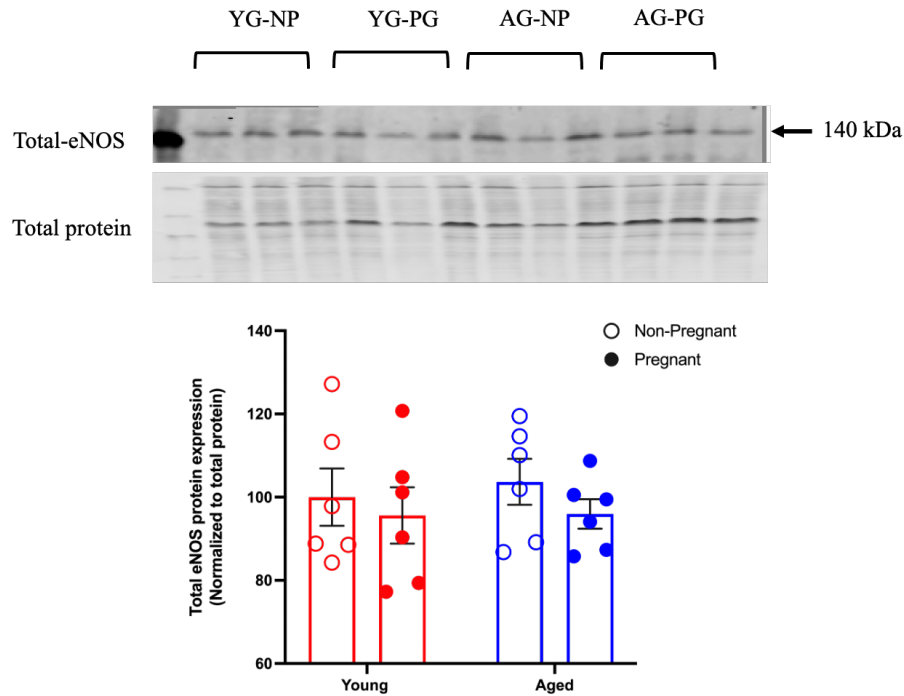

**Supplementary Figure 1. Total eNOS protein expression in mesenteric arteries of young and aged pregnant rats.** Western blot analysis of total eNOS protein expression, normalized to total protein, in mesenteric arteries of young (3-4 months; in red) and aged (9-9.5 months; in blue) pregnant (on gestational day 20; closed circles) and non-pregnant (age-matched; open circles) rats. Data are presented as mean $\pm$ SEM and expressed as percentage of control (i.e. the mean of the non-pregnant young group); analyzed by two-way ANOVA with Sidak's multiple comparisons post-hoc test; n=6/group. YG-NP=Young non-pregnant; YG-PG=Young pregnant; AG-NP=Aged non-pregnant; AG-PG= Aged pregnant.
